# Supplementary material for: Food-borne bacteria analysis using a diatomite bioinspired SERS platform
Source: Royal Society of Chemistry journal article supplement (doi:10.1039/d4tb00488d), 2024-01-01
Supplement: d4tb00488d1.pdf [file d4tb00488d1.pdf]

## Electronic Supplementary Information

### Food-borne bacteria analysis using diatomite bioinspired SERS platform

Yikai Chen<sup>a,b#</sup>, Binggang Ye<sup>a#</sup>, Mengling Ning<sup>a,b</sup>, Meng Li<sup>b</sup>, Yixuan Pu<sup>b</sup>, Zhiming Liu<sup>b</sup>, Huiqing Zhong<sup>b\*</sup>, Chaofan Hu<sup>c\*</sup>, Zhouyi Guo<sup>b\*</sup>

<sup>a</sup>Healthy Medical Engineering Technology Research Center, Guangdong Food and Drug Vocational College, Guangzhou 510520, PR China

<sup>b</sup>MOE Key Laboratory of Laser Life Science & SATCM Third Grade Laboratory of Chinese Medicine and Photonics Technology, College of Biophotonics, South China Normal University, Guangzhou 510631, PR China

<sup>c</sup>College of Materials and Energy, South China Agricultural University, Guangzhou 510642, PR China

<sup>#</sup>These authors contributed equally.

#### \*Corresponding authors:

Prof. Zhou-Yi Guo (Z.Y. Guo)

E-mail: ann@scnu.edu.cn

Prof. Chao-fan Hu (C.F. Hu)

Email: thucf@scau.edu.cn

Prof. Hui-Qing Zhong (H.Q. Zhong)

E-mail: zhonghq@scnu.edu.cn

Table S1 Typical SERS Peaks of IR-780 on Dia-MPN-Au.

| Raman shift (cm <sup>-1</sup> ) | Concentration (mol/L) | Enhancement Factor   |
|---------------------------------|-----------------------|----------------------|
| 939                             | 10 <sup>-5</sup>      | 1.25×10 <sup>3</sup> |
|                                 | 10 <sup>-6</sup>      | 3.94×10 <sup>3</sup> |
|                                 | 10 <sup>-7</sup>      | 1.85×10 <sup>4</sup> |
|                                 | 10 <sup>-8</sup>      | 7.89×10 <sup>4</sup> |
|                                 | 10 <sup>-9</sup>      | 6.68×10 <sup>5</sup> |
|                                 | 10 <sup>-10</sup>     | 3.02×10 <sup>6</sup> |
|                                 | 10 <sup>-11</sup>     | 1.18×10 <sup>7</sup> |
| 1208                            | 10 <sup>-5</sup>      | 1.47×10 <sup>3</sup> |
|                                 | 10 <sup>-6</sup>      | 3.79×10 <sup>3</sup> |
|                                 | 10 <sup>-7</sup>      | 2.10×10 <sup>4</sup> |
|                                 | 10 <sup>-8</sup>      | 9.94×10 <sup>4</sup> |
|                                 | 10 <sup>-9</sup>      | 5.45×10 <sup>5</sup> |
|                                 | 10 <sup>-10</sup>     | 1.50×10 <sup>6</sup> |
|                                 | 10 <sup>-11</sup>     | 7.75×10 <sup>6</sup> |
| 1469                            | 10 <sup>-5</sup>      | 1.00×10 <sup>3</sup> |
|                                 | 10 <sup>-6</sup>      | 3.16×10 <sup>3</sup> |
|                                 | 10 <sup>-7</sup>      | 1.66×10 <sup>4</sup> |
|                                 | 10 <sup>-8</sup>      | 5.45×10 <sup>4</sup> |
|                                 | 10 <sup>-9</sup>      | 2.87×10 <sup>5</sup> |
|                                 | 10 <sup>-10</sup>     | 9.82×10 <sup>5</sup> |
|                                 | 10 <sup>-11</sup>     | 4.26×10 <sup>6</sup> |

Table S2 Tentative assignments of the SERS bands of IR-780 induced by Dia-MPN-Au.

| SERS Band (cm <sup>-1</sup> ) | Band Assignment                                                   |
|-------------------------------|-------------------------------------------------------------------|
| 717                           | Out-of-plane bending vibration of C-H                             |
| 800                           | In plane bending vibration of C-H, C-C stretching vibration       |
| 939                           | Out-of-plane bending vibration of C-H                             |
| 1122                          | C-C-N stretching vibration, ring bending vibration of C=C-H       |
| 1208                          | C=C stretching vibration                                          |
| 1370                          | -CH <sub>2</sub> -twisting bending, C=C-H (C-H) bending vibration |
| 1408                          | Scissoring vibration                                              |
| 1469                          | -CH <sub>2</sub> - scissoring vibration                           |
| 1529                          | C=C, C=N stretching vibration                                     |

Table S3 Typical SERS Peaks of MB on Dia-MPN-Au.

| Raman shift (cm <sup>-1</sup> ) | Concentration (mol/L) | Enhancement Factor   |
|---------------------------------|-----------------------|----------------------|
| 773                             | 10 <sup>-5</sup>      | 2.32×10 <sup>3</sup> |
|                                 | 10 <sup>-6</sup>      | 1.71×10 <sup>4</sup> |
|                                 | 10 <sup>-7</sup>      | 6.54×10 <sup>4</sup> |
|                                 | 10 <sup>-8</sup>      | 1.37×10 <sup>5</sup> |
|                                 | 10 <sup>-9</sup>      | 9.07×10 <sup>5</sup> |
| 1398                            | 10 <sup>-5</sup>      | 2.83×10 <sup>3</sup> |
|                                 | 10 <sup>-6</sup>      | 2.04×10 <sup>4</sup> |
|                                 | 10 <sup>-7</sup>      | 7.34×10 <sup>4</sup> |
|                                 | 10 <sup>-8</sup>      | 1.63×10 <sup>5</sup> |
|                                 | 10 <sup>-9</sup>      | 3.01×10 <sup>5</sup> |
| 1625                            | 10 <sup>-5</sup>      | 8.86×10 <sup>2</sup> |
|                                 | 10 <sup>-6</sup>      | 7.51×10 <sup>3</sup> |
|                                 | 10 <sup>-7</sup>      | 2.09×10 <sup>4</sup> |
|                                 | 10 <sup>-8</sup>      | 4.96×10 <sup>4</sup> |
|                                 | 10 <sup>-9</sup>      | 2.92×10 <sup>5</sup> |

Table S4 Tentative assignments of the SERS bands of MB induced by Dia-MPN-Au.

| SERS Band/cm <sup>-1</sup> | Band Assignment               |
|----------------------------|-------------------------------|
| 669                        | Out-of-plane bending of C-H   |
| 773                        | In-plane bending of C-H       |
| 885                        | In-plane bending of C-H       |
| 1041                       | In-plane bending of C-H       |
| 1185                       | Stretching of C-N             |
| 1398                       | Symmetrical stretching of C-N |
| 1624                       | Ring stretching of C-C        |
